# Supplementary material for: (H2NC4H8NCH2CH2NH2)2Zn2Sn2Se7: a hybrid ternary semiconductor stabilized by amine molecules acting simultaneously as ligands and counterions
Source: Royal Society of Chemistry journal article supplement (doi:10.1039/b821859e), 2009-01-01
Supplement: b821859e.pdf [file b821859e.pdf]

## SUPPORTING INFORMATION

# **(H<sub>2</sub>NC<sub>4</sub>H<sub>8</sub>NCH<sub>2</sub>CH<sub>2</sub>NH<sub>2</sub>)<sub>2</sub>Zn<sub>2</sub>Sn<sub>2</sub>Se<sub>7</sub>: A Hybrid Ternary Semiconductor Stabilized by Amine Molecules Acting Simultaneously as Ligands and Counterions**

Aggelos Philippidis,<sup>a</sup> Thomas Bakas<sup>b</sup> and Pantelis N. Trikalitis\*<sup>a</sup>

<sup>a</sup> *Department of Chemistry, University of Crete, Voutes 71003 Heraklion, Greece. Fax:0030 2810 545001; Tel:0030 2810 545052; E-mail: ptrikal@chemistry.uoc.gr*

<sup>b</sup> *Department of Physics, University of Ioannina, Ioannina 45110, Greece.*

### Table of Contents

|                                  |    |
|----------------------------------|----|
| Powder X-ray Diffraction (PXRD)  | S2 |
| Infrared spectroscopy            | S3 |
| Thermogravimetric analysis (TGA) | S4 |

**Powder X-ray Diffraction (PXRD).** The powder X-ray diffraction pattern of **1** was collected on a Rigaku D/MAX-2000H rotating anode diffractometer (CuK $\alpha$  radiation) equipped with a secondary pyrolytic graphite monochromator operated at 40 kV and 178 mA. The scan rate was 0.15 deg/min with a step size of 0.01 deg. The sample was ground and spread on an aluminium holder. The simulated PXRD pattern of **1** was calculated using Powder Cell 2.3 from the corresponding single crystal structure. A comparison between the experimental and the calculated PXRD is shown in Figure S1 below.

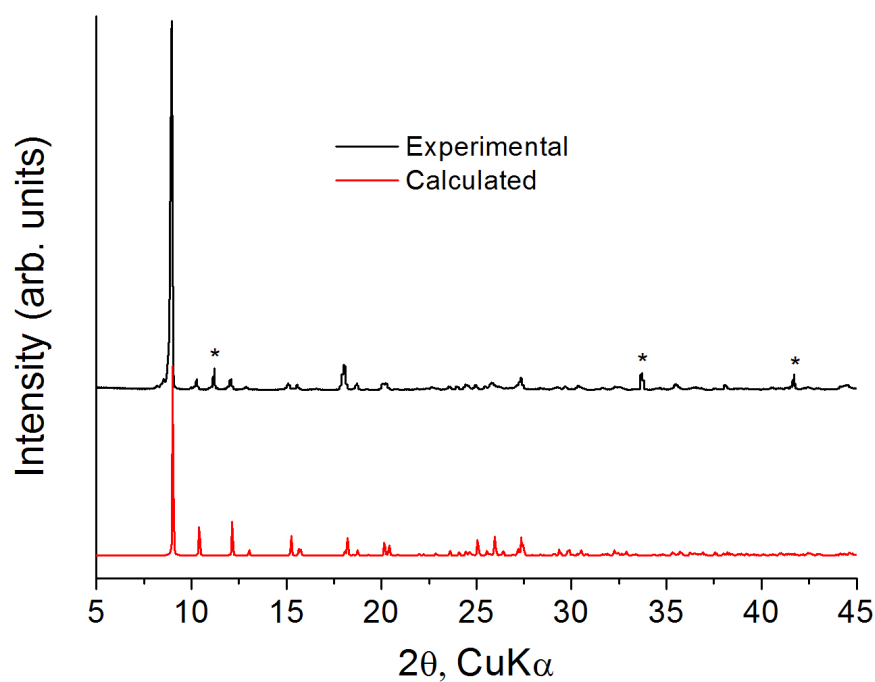

**Figure S1.** Experimental (black line) and calculated (red line) PXRD pattern for **1**. Asterisks indicate unidentified impurities.

**Infrared spectroscopy.** The ATR-IR spectrum of **1** was recorded on a Thermo-Electron Nicolet 6700 FT-IR optical spectrometer with a DTGS KBr. The spectrum is shown in Figure S3, where the characteristic absorption bands of  $\text{-NH}_2^+$ - and  $\text{-NH}_2$  groups<sup>1</sup> are clearly observed.

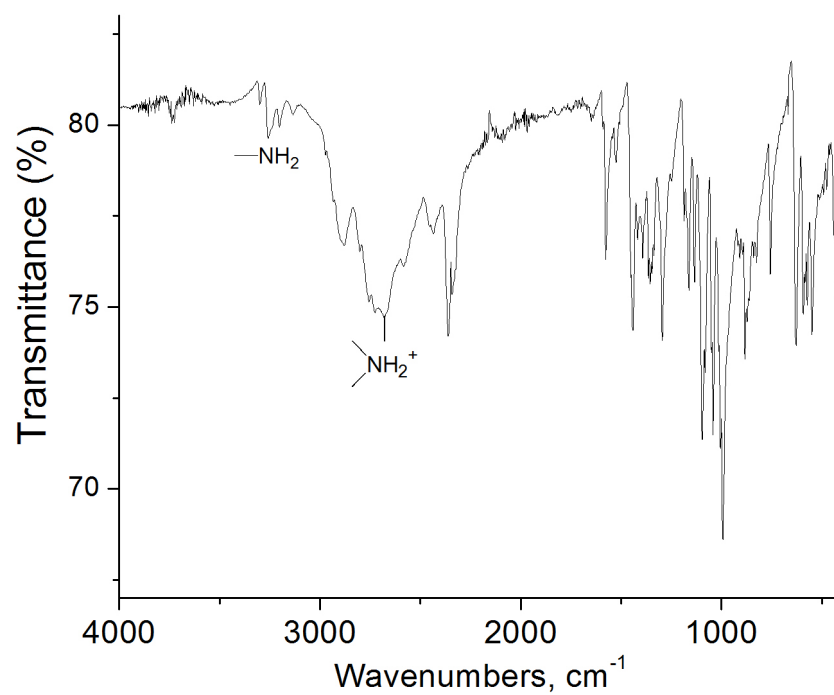

**Figure S2.** ATR-IR spectrum of **1**.

**Thermogravimetric analysis (TGA)** was performed using a TA SDT Q 600 analysis system. An amount of 20 mg of **1** was placed inside an alumina cup and heated up to 600 °C under Argon flow with a heating rate of 5 °C/min. The compound shows no appreciable weight loss up to 230 °C consistent with the fact that contains no solvent molecules. Between 230 and 390 °C, weight loss occurs due to the decomposition of the organic molecules. The observed weight loss (25%) correlates well with that calculated from the molecular formula of **1** assuming completely removal of the organic molecules (22%). The inorganic residue at 600 °C examined by PXRD was found to contain poorly crystalline ZnSe and SnSe<sub>2</sub>.

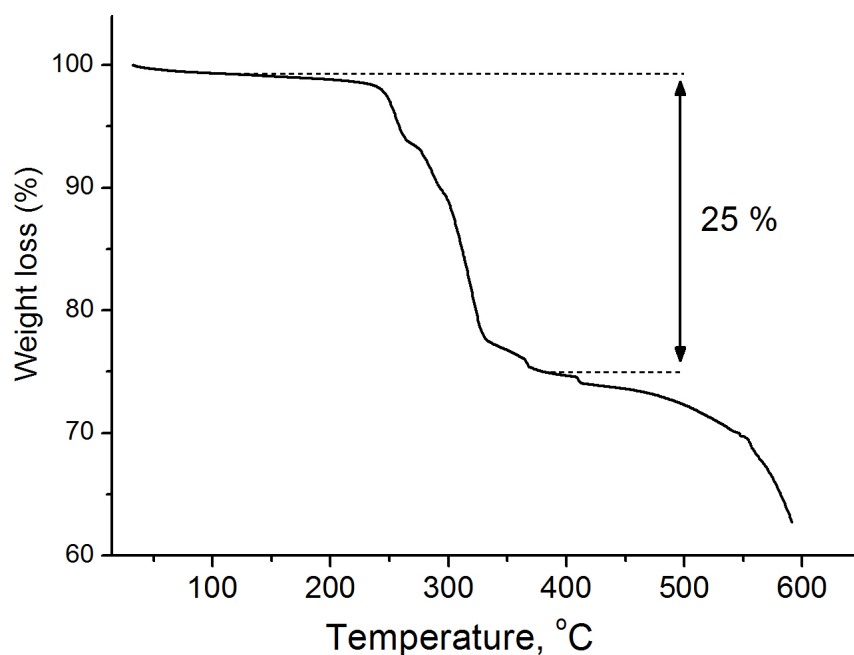

**Figure S3.** TGA curve of **1** under Argon flow.
